# Supplementary material
Source: MDPI journal article supplement (https://www.mdpi.com/2077-0472/10/9/416)
Supplement: s1 [file s1]

## Supplementary Materials

**Table S1** Error Matrix of the Lucao Sampling site on August 17

|                        | Rice | Grains/<br>Vegetables | Wasteland | Building | Cemetery | Total | User's<br>accuracy |
|------------------------|------|-----------------------|-----------|----------|----------|-------|--------------------|
| Rice                   | 154  | 35                    | 1         | 0        | 11       | 201   | 77%                |
| Grains/<br>Vegetables  | 7    | 3                     | 3         | 0        | 0        | 13    | 23%                |
| Wasteland              | 4    | 5                     | 59        | 0        | 6        | 74    | 80%                |
| Building               | 0    | 0                     | 0         | 5        | 1        | 6     | 83%                |
| Cemetery               | 2    | 1                     | 5         | 0        | 5        | 13    | 38%                |
| Total                  | 167  | 44                    | 68        | 5        | 23       | 307   | -                  |
| Producer's<br>accuracy | 92%  | 7%                    | 87%       | 100%     | 22%      | -     | -                  |

Overall accuracy: 74% ; Kappa value: 0.546

**Table S2** Error Matrix of the Lucao Sampling site on September 28

|                        | Rice | Grains/<br>Vegetables | Wasteland | Building | Cemetery | Total | User's<br>accuracy |
|------------------------|------|-----------------------|-----------|----------|----------|-------|--------------------|
| Rice                   | 219  | 11                    | 28        | 1        | 6        | 265   | 83%                |
| Grains/<br>Vegetables  | 9    | 4                     | 4         | 0        | 0        | 17    | 24%                |
| Wasteland              | 1    | 0                     | 5         | 0        | 0        | 6     | 83%                |
| Building               | 0    | 0                     | 0         | 5        | 1        | 6     | 83%                |
| Cemetery               | 1    | 0                     | 5         | 1        | 6        | 13    | 46%                |
| Total                  | 230  | 15                    | 42        | 7        | 13       | 307   | -                  |
| Producer's<br>accuracy | 95%  | 27%                   | 12%       | 71%      | 46%      | -     | -                  |

Overall accuracy: 78% ; Kappa value: 0.359

**Table S3** Error Matrix of the Minxiong Sampling site on September 7

|                         | Rice | Grains/<br>Vegetables | Pineapple<br>field | Greenhouse/<br>Building | Vacant<br>lot | Total | User's<br>accuracy |
|-------------------------|------|-----------------------|--------------------|-------------------------|---------------|-------|--------------------|
| Rice                    | 229  | 0                     | 0                  | 6                       | 0             | 235   | 97%                |
| Grains/<br>Vegetables   | 14   | 2                     | 0                  | 4                       | 0             | 20    | 10%                |
| Pineapple field         | 3    | 0                     | 0                  | 24                      | 0             | 27    | 0%                 |
| Greenhouse/<br>Building | 2    | 0                     | 0                  | 15                      | 0             | 17    | 88%                |
| Vacant lot              | 5    | 0                     | 0                  | 20                      | 3             | 28    | 11%                |
| Total                   | 253  | 2                     | 0                  | 69                      | 3             | 327   | -                  |
| Producer's<br>accuracy  | 91%  | 100%                  | -                  | 22%                     | 100%          | -     | -                  |

Overall accuracy: 76% ; Kappa value: 0.448

**Table S4** Error matrix of the Minxiong Sampling site on October 5

|                         | Rice | Grains/<br>Vegetables | Pineapple<br>field | Greenhouse/<br>Building | Vacant<br>lot | Total | User's<br>accuracy |
|-------------------------|------|-----------------------|--------------------|-------------------------|---------------|-------|--------------------|
| Rice                    | 269  | 3                     | 0                  | 0                       | 0             | 272   | 99%                |
| Grains/<br>Vegetables   | 10   | 6                     | 6                  | 7                       | 0             | 29    | 21%                |
| Pineapple field         | 0    | 0                     | 18                 | 0                       | 0             | 18    | 100%               |
| Greenhouse/<br>Building | 0    | 0                     | 5                  | 20                      | 0             | 25    | 80%                |
| Vacant lot              | 0    | 0                     | 6                  | 6                       | 0             | 12    | 0%                 |
| Total                   | 279  | 9                     | 35                 | 33                      | 0             | 356   | -                  |
| Producer's<br>accuracy  | 96%  | 67%                   | 51%                | 61%                     | -             | -     | -                  |

Overall accuracy: 88% ; Kappa value: 0.668

**Table S5** Error Matrix of the Xingang Sampling site on September 13

|                         | Rice | Greenhouse/<br>Building | Grains/<br>Vegetables | Vacant<br>lot | Total | User's<br>accuracy |
|-------------------------|------|-------------------------|-----------------------|---------------|-------|--------------------|
| Rice                    | 197  | 16                      | 27                    | 0             | 240   | 82%                |
| Greenhouse/<br>Building | 2    | 64                      | 2                     | 0             | 68    | 94%                |
| Grains/<br>Vegetables   | 12   | 3                       | 15                    | 0             | 30    | 50%                |
| Vacant lot              | 4    | 19                      | 11                    | 4             | 38    | 11%                |
| Total                   | 215  | 102                     | 55                    | 4             | 376   | -                  |
| Producer's<br>accuracy  | 92%  | 63%                     | 27%                   | 100%          | -     | -                  |

Overall accuracy: 74% ; Kappa value: 0.555

**Table S6** Error Matrix of the Xingang Sampling site on October 26

|                         | Rice | Greenhouse/<br>Building | Grains/<br>Vegetables | Vacant lot | Total | User's<br>accuracy |
|-------------------------|------|-------------------------|-----------------------|------------|-------|--------------------|
| Rice                    | 157  | 47                      | 0                     | 0          | 204   | 77%                |
| Greenhouse/<br>Building | 0    | 60                      | 0                     | 0          | 60    | 100%               |
| Grains/<br>Vegetables   | 23   | 33                      | 2                     | 0          | 58    | 3%                 |
| Vacant lot              | 5    | 28                      | 0                     | 0          | 33    | 0%                 |
| Total                   | 185  | 168                     | 2                     | 0          | 355   | -                  |
| Producer's<br>accuracy  | 85%  | 36%                     | 100%                  | -          | -     | -                  |

Overall accuracy: 62% ; Kappa value: 0.382

**Table S7** Error Matrix of the Budai Sampling site on September 6

|                     | Fish farm | Empty pond | Woodland | Vacant lot | Building | Total | User's accuracy |
|---------------------|-----------|------------|----------|------------|----------|-------|-----------------|
| Fish farm           | 99        | 0          | 9        | 7          | 0        | 115   | 86%             |
| Empty pond          | 0         | 0          | 0        | 0          | 0        | 0     | -               |
| Woodland            | 9         | 0          | 49       | 0          | 0        | 58    | 84%             |
| Vacant lot          | 0         | 0          | 0        | 41         | 3        | 44    | 93%             |
| Building            | 0         | 0          | 0        | 5          | 9        | 14    | 64%             |
| Total               | 108       | 0          | 58       | 53         | 12       | 231   | -               |
| Producer's accuracy | 92%       | -          | 84%      | 77%        | 75%      | -     | -               |

Overall accuracy: 86% ; Kappa value: 0.783

**Table S8** Error Matrix of the Budai Sampling site on October 15

|                     | Fish farm | Empty pond | Woodland | Vacant lot | Building | Total | User's accuracy |
|---------------------|-----------|------------|----------|------------|----------|-------|-----------------|
| Fish farm           | 97        | 0          | 21       | 3          | 0        | 121   | 80%             |
| Empty pond          | 0         | 4          | 0        | 6          | 0        | 10    | 40%             |
| Woodland            | 9         | 0          | 14       | 3          | 0        | 26    | 54%             |
| Vacant lot          | 1         | 0          | 0        | 86         | 0        | 87    | 99%             |
| Building            | 0         | 19         | 0        | 0          | 0        | 19    | 0%              |
| Total               | 107       | 23         | 35       | 98         | 0        | 263   | -               |
| Producer's accuracy | 91%       | 17%        | 40%      | 88%        | -        | -     | -               |

Overall accuracy: 76% ; Kappa value: 0.649

**Table S9** Error Matrix of the Yizhu Sampling site on August 10

|                          | Fish farm | Building | Rice field | Empty pond/<br>Wasteland | Total | User's<br>accuracy |
|--------------------------|-----------|----------|------------|--------------------------|-------|--------------------|
| Fish farm                | 34        | 0        | 0          | 141                      | 175   | 19%                |
| Building                 | 0         | 20       | 0          | 5                        | 25    | 80%                |
| Rice field               | 7         | 0        | 50         | 0                        | 57    | 88%                |
| Empty pond/<br>Wasteland | 16        | 0        | 0          | 152                      | 168   | 90%                |
| Total                    | 57        | 20       | 50         | 298                      | 425   | -                  |
| Producer's<br>accuracy   | 60%       | 100%     | 100%       | 51%                      | -     | -                  |

Overall accuracy: 60% ; Kappa value: 0.387

**Table S10** Error Matrix of the Yizhu Sampling site on September 21

|                          | Fish farm | Building | Rice<br>field | Empty<br>pond/<br>Wasteland | Total | User's<br>accuracy |
|--------------------------|-----------|----------|---------------|-----------------------------|-------|--------------------|
| Fish farm                | 159       | 0        | 16            | 0                           | 175   | 91%                |
| Building                 | 0         | 22       | 0             | 3                           | 25    | 88%                |
| Rice field               | 15        | 0        | 42            | 0                           | 57    | 74%                |
| Empty pond/<br>Wasteland | 30        | 0        | 7             | 131                         | 168   | 78%                |
| Total                    | 204       | 22       | 65            | 134                         | 425   | -                  |
| Producer's<br>accuracy   | 78%       | 100%     | 65%           | 98%                         | -     | -                  |

Overall accuracy: 83% ; Kappa value: 0.745
